# Supplementary material
Source: publisher figshare collection journal article supplement (https://diabetesjournals.figshare.com/articles/dataset/_/23564925)
Supplement: Supplementary file 1 [file 1]

**Supplementary Table 2**

| <b>Antibodies:</b>                                                 | <b>Sources:</b>           | <b>Catalog Number:</b>    |
|--------------------------------------------------------------------|---------------------------|---------------------------|
| anti-Cpe                                                           | Millipore Sigma           | #AB5314                   |
| anti-Pc1/3                                                         | Abcam                     | #ab191452                 |
| anti-Pc2                                                           | Abcam                     | #ab135808                 |
| anti-ProSAAS                                                       | Millipore Sigma           | #ABN2268M                 |
| anti-Cpd                                                           | Bethyl Laboratories       | #A305-514A                |
| anti-Insulin                                                       | Cell Signaling Technology | #L6B10                    |
| anti-Insulin                                                       | Dako                      | #IR002                    |
| anti-Proinsulin (CCI-17)                                           | Abnova                    | #MAB2868                  |
| anti-amidated IAPP                                                 | MedImmune                 | #F025                     |
| anti-non-amidated IAPP                                             | MedImmune                 | #F084                     |
| anti-IAPP                                                          | Peninsula Laboratories    | #T-4145                   |
| anti-Actin                                                         | Abcam                     | #ab8226                   |
| Anti-Gapdh                                                         | Novus Biologicals         | #NB300-221                |
| Anti-phospho eIF2alpha                                             | Cell Signaling Technology | #3597                     |
| Anti-Atf4                                                          | Proteintech               | #10835-1-AP               |
| Anti-spliced Xbp1                                                  | Cell Signaling Technology | #12782                    |
| Anti-Bip                                                           | Invitrogen                | #PA1-014A                 |
| Anti-Chop                                                          | Santa Cruz Biotechnology  | #sc-56107                 |
| IRDye-conjugated secondary antibodies                              | LI-COR                    | #926-68070 and #926-32211 |
| Goat anti Rabbit IgG (H+L)<br>Secondary Antibody, Oregon Green 488 | Invitrogen                | #O11038                   |
| Biotin-SP-AffiniPure Donkey Anti-Mouse IgG (H+L)                   | Cedarlane Labs            | #715-065-150              |
| v500 Streptavidin                                                  | BD                        | #561419                   |

|                                        |                            |                        |
|----------------------------------------|----------------------------|------------------------|
| Alexa 488 goat anti-guinea pig         | Thermo Fisher Scientific   | #A11073                |
| Alexa 594 goat anti-mouse              | Thermo Fisher Scientific   | #A32742                |
| Alexa 647 goat anti-rabbit             | Thermo Fisher Scientific   | #A32733                |
| <b>Dyes and Probes:</b>                | <b>Sources:</b>            | <b>Catalog Number:</b> |
| IRDye-conjugate Streptavidin           | LI-COR                     | #926-32230             |
| CellRox                                | Thermo Fisher Scientific   | #C10422                |
| MitoSox                                | Thermo Fisher Scientific   | #M36008                |
| TMRM                                   | Thermo Fisher Scientific   | #T668                  |
| MTG                                    | New England Biolabs        | #9074S                 |
| TUNEL staining reagents                | Roche                      | #11684795910           |
| Click EdU reagents                     | Invitrogen                 | #C10337                |
| 2-NBDG                                 | Thermo Fisher Scientific   | #N13195                |
| <b>Chemicals and Consumables:</b>      | <b>Sources:</b>            | <b>Catalog Number:</b> |
| Streptozotocin                         | Sigma-Aldrich              | #S0130-100MG           |
| EdU                                    | Toronto Research Chemicals | #E932175               |
| Biotin-alkyne                          | Invitrogen                 | #C33372                |
| L-Azidohomoalanine                     | Invitrogen                 | #C10102                |
| High Capacity NeutrAvidin Agarose      | Thermo Scientific          | #209202                |
| μ-Slide 8 Well                         | Ibidi                      | #800826                |
| Lab-Tek™ II Chamber Slide              | Thermo Scientific          | #154534PK              |
| <b>Commercial Assays:</b>              | <b>Sources:</b>            | <b>Catalog Number:</b> |
| Rodent insulin chemiluminescence ELISA | Alpco                      | #80-INSMR              |
| Rodent proinsulin ELISA                | Mercodia                   | #10-1232-01            |
| Lactate ELISA                          | Abcam                      | #ab65330               |
| RNeasy Plus Micro kit                  | Qiagen                     | #74034                 |

|                            |                         |                         |
|----------------------------|-------------------------|-------------------------|
| QIAamp DNA Micro kit       | Qiagen                  | #56304                  |
| PureLink RNA Micro kit     | Invitrogen              | #12183016               |
| SuperScript VILO kit       | Invitrogen              | #11754050               |
| Fast SYBR Green Master Mix | Applied Biosystems      | #4385612                |
| <b>Rodent Diets:</b>       | <b>Sources:</b>         | <b>Catalog Number:</b>  |
| Chow                       | Teklad                  | #2918                   |
| Low fat diet (10% fat)     | Research Diets          | #D12450H                |
| High fat diet (45% fat)    | Research Diets          | #D12451                 |
| High fat diet (60% fat)    | Research Diets          | #D12492                 |
| <b>Primers:</b>            | <b>Forward Sequence</b> | <b>Reverse Sequence</b> |
| <i>Rplp</i>                | TCGGGTCCTAGACCAGTGTTTC  | AGATTCGGGATATGCTGTTGGC  |
| <i>Cpe</i>                 | CAGCAAGAGGACGGCATCTC    | GTCCAACCGCCTCATTACCAT   |
| <i>Pcsk1</i>               | CTTTCGCCTTCTTTTGCGTTT   | TCCGCCGCCCATTCATTAAC    |
| <i>Pcsk2</i>               | GTGTGATGGTTTTTGCGTCTG   | GGGAGCTTTCGGACTCCAA     |
| <i>proSAAS</i>             | CGACGAGACTCCTGACGTG     | GCACCTCGGGACCCAAATC     |
| <i>Ins2</i>                | GCTTCTTCTACACACCCATGTC  | AGCACTGATCTACAATGCCAC   |
| <i>Iapp</i>                | CGGACCACTGAAAGGGATCTT   | CGTGTTGCACTTCCGTTTGT    |
| <i>7b2</i>                 | CCTCAAGGCTGGTCTCTGCTA   | GGCCCAACAAGATTCATGGC    |
| <i>Nd1</i>                 | CTAGCAGAAACAAACCGGGC    | CCGGCTGCGTATTCTACGTT    |
| <i>16s</i>                 | CCGCAAGGGAAAGATGAAAGAC  | TCGTTTGGTTTCGGGGTTTC    |
| <i>Aldh1a3</i>             | TTCTTGGGCATGTGCTTAGA    | AGCCTGAAGCCCAAATACCAA   |
| <i>Pgc1a</i>               | TATGGAGTGACATAGAGTGTGCT | CCACTTCAATCCACCCAGAAAG  |
| <i>MafA</i>                | AGGAGGAGGTCATCCGACTG    | CTTCTCGCTCTCCGAAATGTG   |
| <i>Pfkp</i>                | CTTGGGACAAAACGCACCCT    | GGAGACAGTAGCAGGAACCAT   |
| <i>Xbp1s</i>               | GGTCTGCTGAGTCCGCAGCAGG  | AGGCTTGGTGTATACATGG     |
